# Supplementary material for: Novel SnO2(ZnO:Sn)m superlattice nanoparticles for ultra-low ppb-level H2S detection
Source: Royal Society of Chemistry journal article supplement (doi:10.1039/d2ce00506a), 2022-01-01
Supplement: d2ce00506a1.pdf [file d2ce00506a1.pdf]

Supporting Information

# Novel $\text{SnO}_2(\text{ZnO}:\text{Sn})_m$ superlattice nanoparticles for ultra-low ppb-level $\text{H}_2\text{S}$ detection

Jianan Huang<sup>a</sup>, Bojia Xu<sup>a</sup>, Binghui Ge<sup>b</sup>, Yi Xu<sup>a</sup>, Baobao Cao<sup>a\*</sup>

<sup>a</sup> Key Laboratory of Advanced Technologies of Materials, Ministry of Education, Southwest Jiaotong University, Chengdu, China

<sup>b</sup> Institute of Physical Science and Information Technology, Anhui University, Hefei, China.

\*Corresponding Author.

E-mail address: baobao-cao@hotmail.com

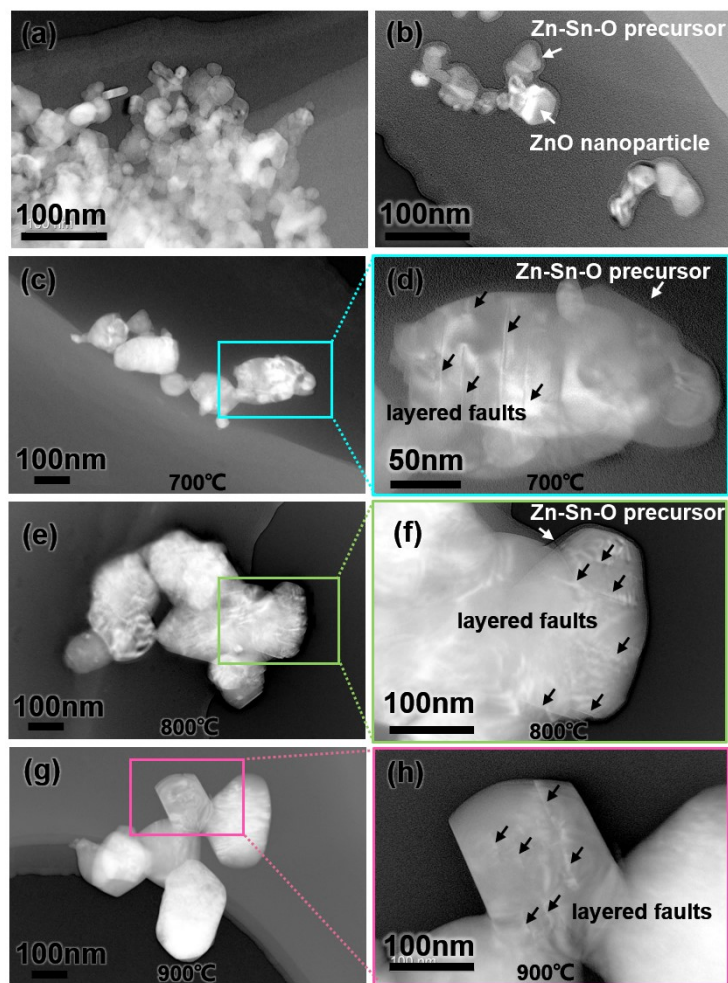

Fig. S1 Inverted image of the Fig. 3 to better display the planar defects

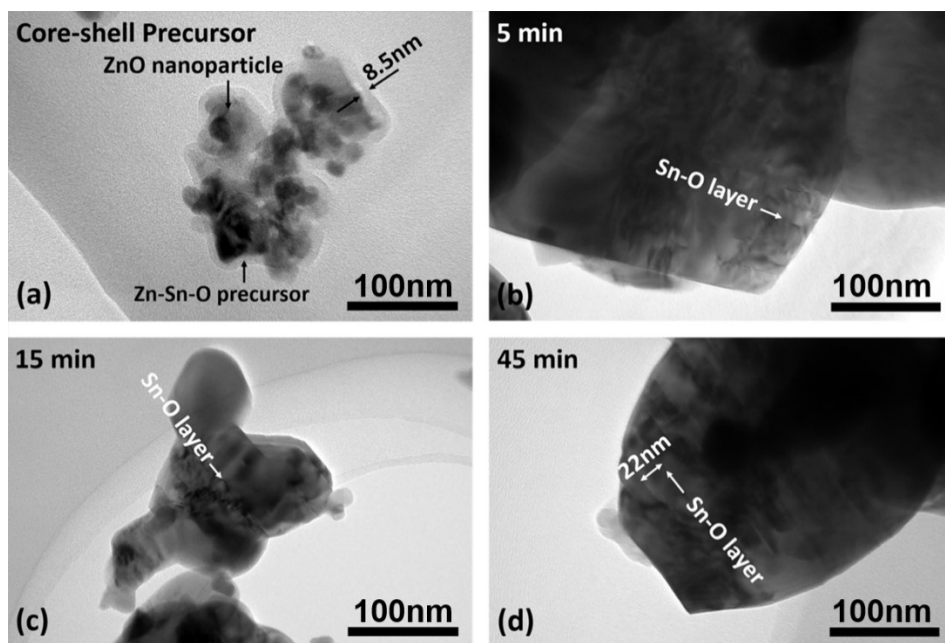

Fig. S2 TEM images of (a) precursor coated ZnO nanoparticles before annealing and annealed for 5 min (b), 15 min (c), and 45 min (d) at 900 °C.
